# Supplementary material for: Generalization of the Partitioning of Shannon Diversity
Source: PLoS One. 2014 Mar 6;9(3):e90289. doi: 10.1371/journal.pone.0090289 (PMC3946064; doi:10.1371/journal.pone.0090289)
Supplement: Appendix S2 — Decomposition of Simpson index. (PDF) [file pone.0090289.s002.pdf]

## Appendix S2: Decomposition of Simpson index

We use Pélissier and Couteron's [1] organization of data to derive the decomposition. We define an indicator  $\mathbf{1}_{sk}$  such that it takes a value of 1 if individual  $k$  belongs to species  $s$ , and of zero otherwise.  $\mathbf{1}_{sk}$  follows a Bernoulli distribution: either an individual belongs to species  $s$  or not.  $\sum_{k=1}^n \mathbf{1}_{sk}$  follows a binomial distribution of variance  $np_s(1 - p_s)$ . A standard partitioning of variance can be applied. Within each community, variance is  $n_i p_{si}(1 - p_{si})$ . The expectation of  $\sum_{k=1}^n \mathbf{1}_{sk}$  is  $np_s$  for pooled data, and that of within-community  $\sum_{k=1}^{n_i} \mathbf{1}_{sk}$  is  $n_i p_{si}$ . We have then:

$$p_s(1 - p_s) = \sum_i \frac{n_i}{n} [p_{si}(1 - p_{si}) + (p_{si} - p_s)^2] \quad (1)$$

Summation of  $p_s(1 - p_s)$  over species provides Simpson's entropy:

$${}^2H_\gamma = \sum_i \frac{n_i}{n} {}^2H_\alpha + \sum_i \frac{n_i}{n} \sum_s (p_{si} - p_s)^2 \quad (2)$$

Assuming  ${}^2H_\gamma = {}^2H_\alpha + {}^2H_\beta$  and  $\alpha$  entropy is the weighted sum of within-community  $\alpha$  entropy values, the second term of (2) can be identified to  $\beta$  entropy in the classical additive partitioning.  ${}^2H_\beta$  is the weighted sum of contributions of communities, denoted  ${}_i^2H_\beta = \sum_s (p_{si} - p_s)^2$ . This additive partitioning of entropy is that of Nei [2] among others. As shown by Jost [3,4],  ${}^2H_\beta$  is constrained by  ${}^2H_\alpha$  since  $\gamma$  entropy is limited to 1. Using  ${}^2H_\beta$  or  $G_{ST} = {}^2H_\beta / {}^2H_\gamma$  as a measure of differentiation has been shown to be erroneous [5-7].

### References:

1. Pélissier R, Couteron P (2007) An operational, additive framework for species diversity partitioning and beta-diversity analysis. *Journal of Ecology* 95: 294-300.
2. Nei M (1973) Analysis of Gene Diversity in Subdivided Populations. *Proceedings of the National Academy of Sciences of the United States of America* 70: 3321-3323.
3. Jost L (2006) Entropy and diversity. *Oikos* 113: 363-375.
4. Jost L (2007) Partitioning diversity into independent alpha and beta components. *Ecology* 88: 2427-2439.
5. Jost L (2008)  $G_{ST}$  and its relatives do not measure differentiation. *Molecular Ecology* 17: 4015-4026.
6. Jost L (2009) D vs.  $G_{ST}$ : Response to Heller and Siegismund (2009) and Ryman and Leimar (2009). *Molecular Ecology* 18: 2088-2091.
7. Heller R, Siegismund HR (2009) Relationship between three measures of genetic differentiation  $G_{ST}$ , D-EST and  $G'_{ST}$ : how wrong have we been? *Molecular Ecology* 18: 2080-2083.
